# Supplementary material
Source: PubMed Central journal article supplement (PMC9833162)
Supplement: Appendix_1_Study_Regions.pdf [file Appendix_1_Study_Regions.pdf]

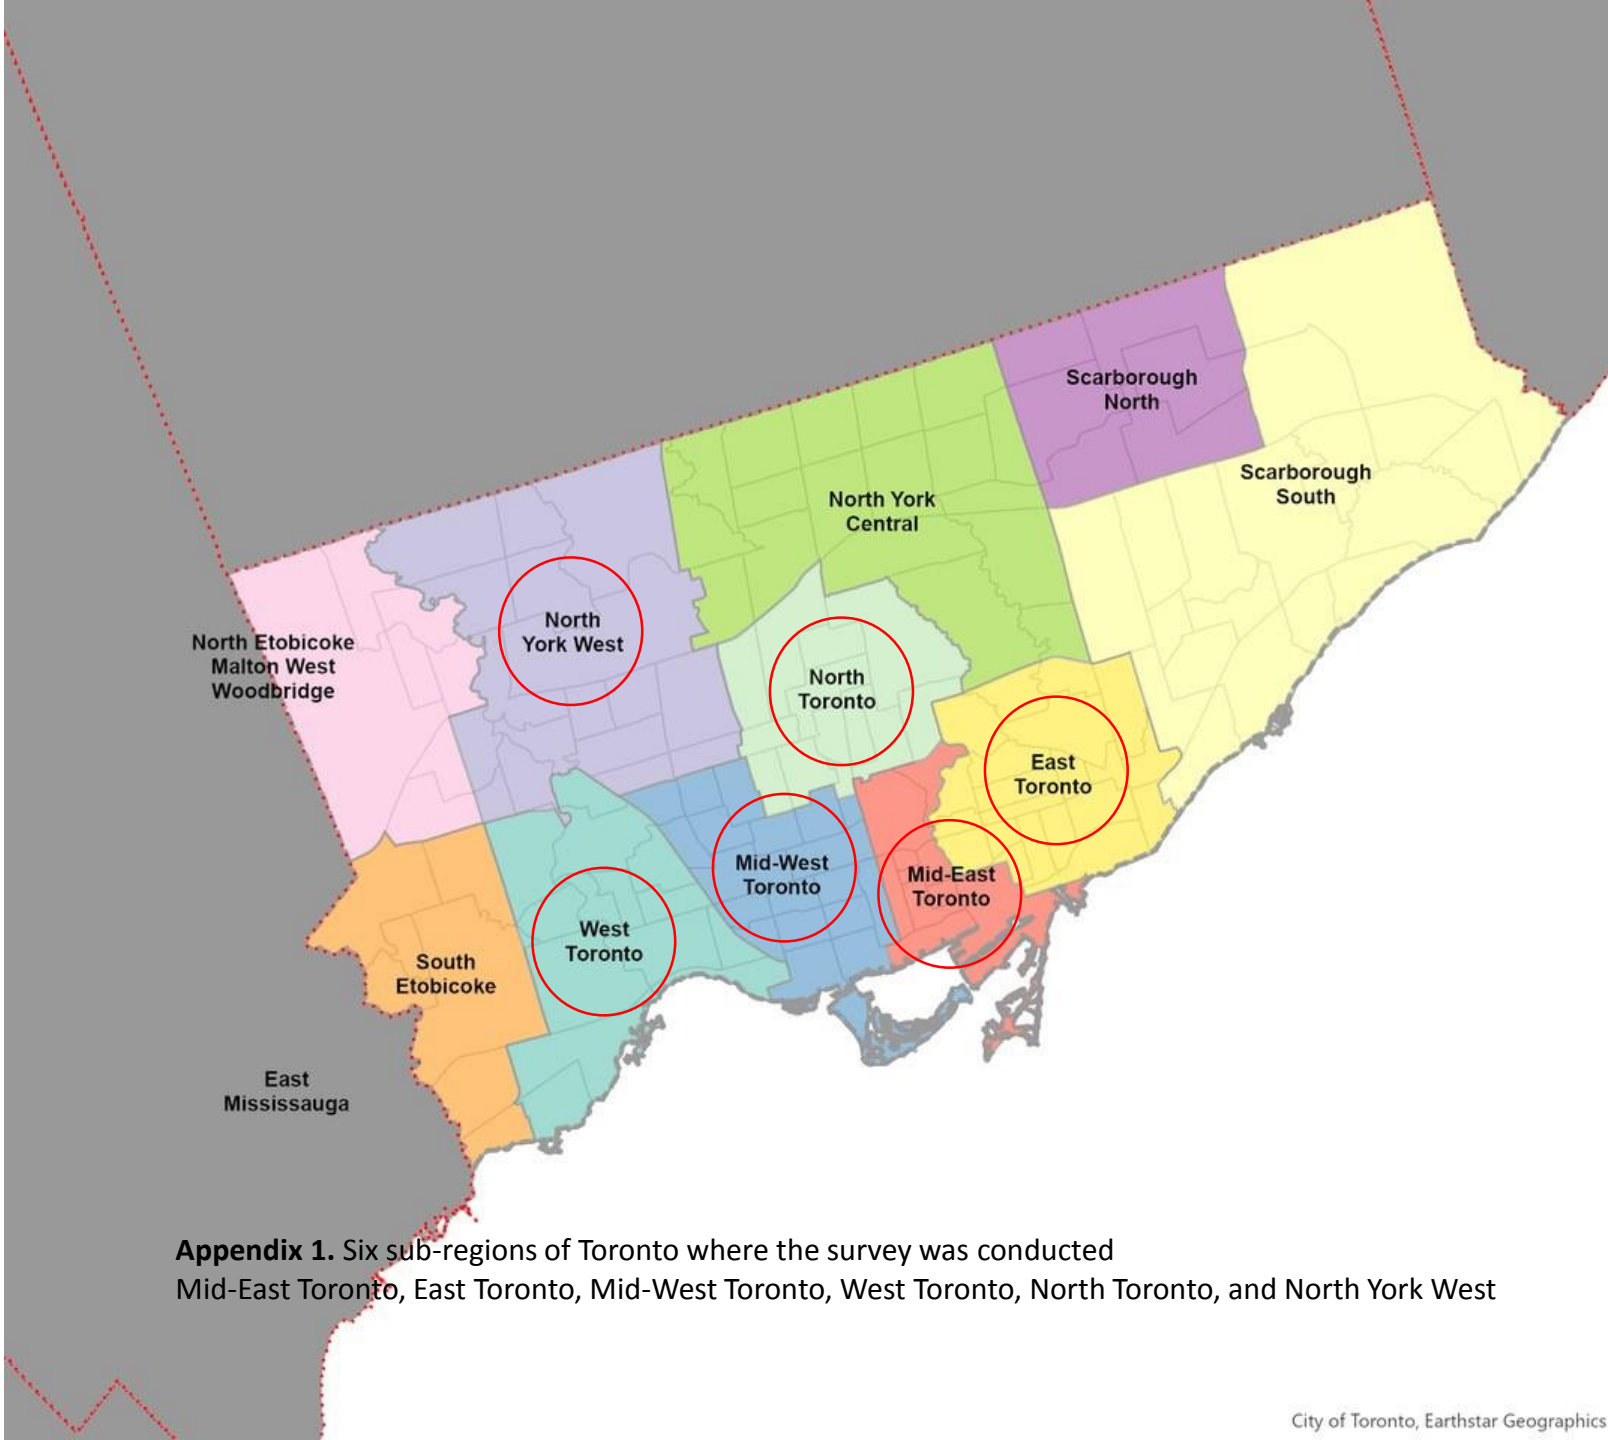

**Appendix 1.** Six sub-regions of Toronto where the survey was conducted  
Mid-East Toronto, East Toronto, Mid-West Toronto, West Toronto, North Toronto, and North York West
