# Supplementary material
Source: PubMed Central journal article supplement (PMC9833162)
Supplement: Appendix_2_Survey_Questions.pdf [file Appendix_2_Survey_Questions.pdf]

## Appendix 2. Keeping Doors Open (KDO) Survey Questions

Summary table of the key survey questions reported in the manuscript and whether they were asked in each type of the survey

| Survey Question                                                                                                                                                                                                                                                                                                                                                           | Survey Type    |             |                    |                      |
|---------------------------------------------------------------------------------------------------------------------------------------------------------------------------------------------------------------------------------------------------------------------------------------------------------------------------------------------------------------------------|----------------|-------------|--------------------|----------------------|
|                                                                                                                                                                                                                                                                                                                                                                           | Email<br>N=420 | Fax<br>N=53 | Telephone<br>N=390 | VM Greeting<br>N=153 |
| <b><i>Whether the practice was open in January 2021</i></b>                                                                                                                                                                                                                                                                                                               |                |             |                    |                      |
| In January 2021, was your practice open to in-person and/or virtual visits?                                                                                                                                                                                                                                                                                               | ✓              | ✓           | ✓                  | ✓                    |
| How long has your practice NOT seen patients in person?                                                                                                                                                                                                                                                                                                                   | ✓              |             |                    |                      |
| How important were each of the following factors in your decision NOT to see patients in person?<br><ul style="list-style-type: none"> <li>- Health concerns</li> <li>- PPE supply</li> <li>- PPE cost</li> <li>- Cost of environmental cleaning</li> <li>- Loss of income</li> <li>- Needed a break</li> <li>- Redeployment</li> <li>- Other (please specify)</li> </ul> | ✓              | ✓           |                    |                      |
| While your practice was NOT seeing patients in person, did you have arrangements for your primary care patients to get primary care elsewhere?                                                                                                                                                                                                                            | ✓              |             |                    |                      |
| <b><i>Care of patients with COVID-19 symptoms</i></b>                                                                                                                                                                                                                                                                                                                     |                |             |                    |                      |
| Thinking about <u>January 2021</u> , did you provide <u>in-person care</u> in your office to patients reporting symptoms consistent with COVID-19 (for example, patients with shortness of breath, cough, or fever)?                                                                                                                                                      | ✓              | ✓           | ✓                  | ✓                    |
| During the month of <u>January 2021</u> , how did you typically care for patients who reported symptoms consistent with COVID-19 who did not have an emergency but needed an in-person assessment?                                                                                                                                                                        | ✓              |             |                    |                      |
| <b><i>Virtual care</i></b>                                                                                                                                                                                                                                                                                                                                                |                |             |                    |                      |

|                                                                                                                                                                                                                                                                                                                                                                                                                                                                                                                                                                                                                                                                                                                                                                      |   |   |  |  |
|----------------------------------------------------------------------------------------------------------------------------------------------------------------------------------------------------------------------------------------------------------------------------------------------------------------------------------------------------------------------------------------------------------------------------------------------------------------------------------------------------------------------------------------------------------------------------------------------------------------------------------------------------------------------------------------------------------------------------------------------------------------------|---|---|--|--|
| <p>Think about all of the time you spent providing clinical care to patients in your office during <u>January 2021</u>. What portion of your time did you spend doing the following?</p> <ul style="list-style-type: none"> <li>- In-person visits (including time spent on IPAC before/after)</li> <li>- Scheduled phone assessments</li> <li>- Scheduled video assessments</li> <li>- One-way e-mail or secure messaging platform (provider can initiate message to patient but patient cannot initiate message)</li> <li>- Two-way e-mail or secure messaging platform (either patient or provider can initiate message exchange)</li> <li>- Other (please specify)</li> </ul>                                                                                    | ✓ | ✓ |  |  |
| <p>Consider the following scenarios with respect to virtual billing codes (K080, K081, K082):</p> <ul style="list-style-type: none"> <li>- If the virtual billing codes <u>remain in place</u> after the pandemic ends, will you offer <b>phone</b> appointments to your patients?</li> <li>- If the virtual billing codes <u>remain in place</u> after the pandemic ends, will you offer <b>video</b> appointments to your patients?</li> <li>- If the virtual billing codes <u>do NOT remain in place</u> after the pandemic ends, will you offer <b>phone</b> appointments to your patients?</li> <li>- If the virtual billing codes <u>do NOT remain in place</u> after the pandemic ends, will you offer <b>video</b> appointments to your patients?</li> </ul> | ✓ | ✓ |  |  |
| <p>How helpful would each of the following supports be for you in providing <u>virtual</u> primary care to your patients?</p> <ul style="list-style-type: none"> <li>- Funding for equipment or software</li> <li>- Billing codes for email and/or secure messaging with patients</li> <li>- Education and guidance for myself on how to provide safe and effective virtual care</li> <li>- Training and support for my staff on integrating virtual care into practice</li> <li>- Practical tools that help me integrate virtual care (e.g. EMR stamps, templates)</li> <li>- Funding and support to enable patients to engage in virtual care</li> </ul>                                                                                                           | ✓ | ✓ |  |  |
| <b><i>Acceptance of new patients, practice closure, and future practice intentions</i></b>                                                                                                                                                                                                                                                                                                                                                                                                                                                                                                                                                                                                                                                                           |   |   |  |  |

|                                                                                                                                                                                                                                                                                                                                                                                                                                                                                                                                                                                             |   |   |   |  |
|---------------------------------------------------------------------------------------------------------------------------------------------------------------------------------------------------------------------------------------------------------------------------------------------------------------------------------------------------------------------------------------------------------------------------------------------------------------------------------------------------------------------------------------------------------------------------------------------|---|---|---|--|
| Thinking about <u>January 2021</u> , were you accepting <u>new patients</u> for primary care?                                                                                                                                                                                                                                                                                                                                                                                                                                                                                               | ✓ | ✓ |   |  |
| Since the start of pandemic March 2020, have you done any of the following?<br><ul style="list-style-type: none"> <li>- Temporarily closed practice without locum coverage</li> <li>- Hired a locum to manage your patients</li> <li>- Decided to close your practice permanently, earlier than planned</li> <li>- Decided to close your practice permanently, as previously planned</li> </ul>                                                                                                                                                                                             | ✓ | ✓ | ✓ |  |
| How important were the following in your decision to temporarily hire a locum?<br><ul style="list-style-type: none"> <li>- Worried about personally contracting COVID-19</li> <li>- Not enough volume/revenue to continue operating practice</li> <li>- Unable to retain support staff</li> <li>- Other clinical work opportunities or re-deployment</li> <li>- Other non-clinical work or projects</li> <li>- Needed a break</li> <li>- Maternity/parental leave</li> <li>- Personal, health, or family reasons requiring time away from work</li> <li>- Other (please specify)</li> </ul> | ✓ |   |   |  |
| Do you plan to close your current practice in the next 5 years?                                                                                                                                                                                                                                                                                                                                                                                                                                                                                                                             | ✓ | ✓ |   |  |
